# Supplementary material
Source: PubMed Central journal article supplement (PMC3415516)

### Fig. S1

Gene context diagram for representative organisms in (A) AtzD/TrzD clustered homologs and (B) barbiturase cluster. The numbering represents proteins belonging to these various groups: 1. COG0154, Asp-tRNA Asn/Glu-tRNA Gln amidotransferase belonging to the amidase signature superfamily; 2. COG1335, amidase related to nicotinamidase and isochorismatase that belong to the cysteine hydrolase superfamily; 3. COG0388, Predicted amidohydrolase that belong to the nitrilase superfamily like nitrilase and cyanide hydratase; 4-7. COG3427, COG1529, COG2080, and COG1319, uracil/thiaine dehydrogenase – precursor to barbiturase; 8. COG2233, Xanthine/uracil permeases; 9. COG0035, Uracil phosphoribosyltransferase; 10. COG0549, Carbamate kinase which belongs to the amino acid kinase superfamily, including uridylate, carbamate, asparto-, and acetylglutamate kinases; 11. trzC, ammelide amidohydrolase. 12. OG0402, Cytosine deaminase and related metal-dependent hydrolases; 13. COG0044, Dihydroorotase and related cyclic amidohydrolases, likely L-Hydantoinases or Allantoinase; 14. FdrA like protein; 15. COG0161, Adenosylmethionine-8-amino-7-oxononoate aminotransferase that belongs to acetyl ornithine aminotransferase family of the pyridoxal phosphate (PLP)-dependent aspartate aminotransferase superfamily, including ornithine aminotransferase, acetylornithine aminotransferase, alanine-glyoxylate aminotransferase, dialkylglycine decarboxylase, 4-aminobutyrate aminotransferase, beta-alanine-pyruvate aminotransferase, adenosylmethionine-8-amino-7-oxononoate aminotransferase, and glutamate-1-semialdehyde 2,1-aminomutase; 16. COG1028, Dehydrogenases with different specificities (related to short-chain alcohol dehydrogenases); 17. COG0145, N-methylhydantoinase A/acetone carboxylase, beta subunit; 18. COG0146, N-methylhydantoinase B/acetone carboxylase, alpha subunit; 19. regulator; 20. ABC transporter permease – representing various COGs; 21. ABC transporter ATP binding domain – representing various COGs; 22. ABC transporter periplasmic component; 23. hypothetical; 24. DUF – domain of unknown function; and 25. transposase.

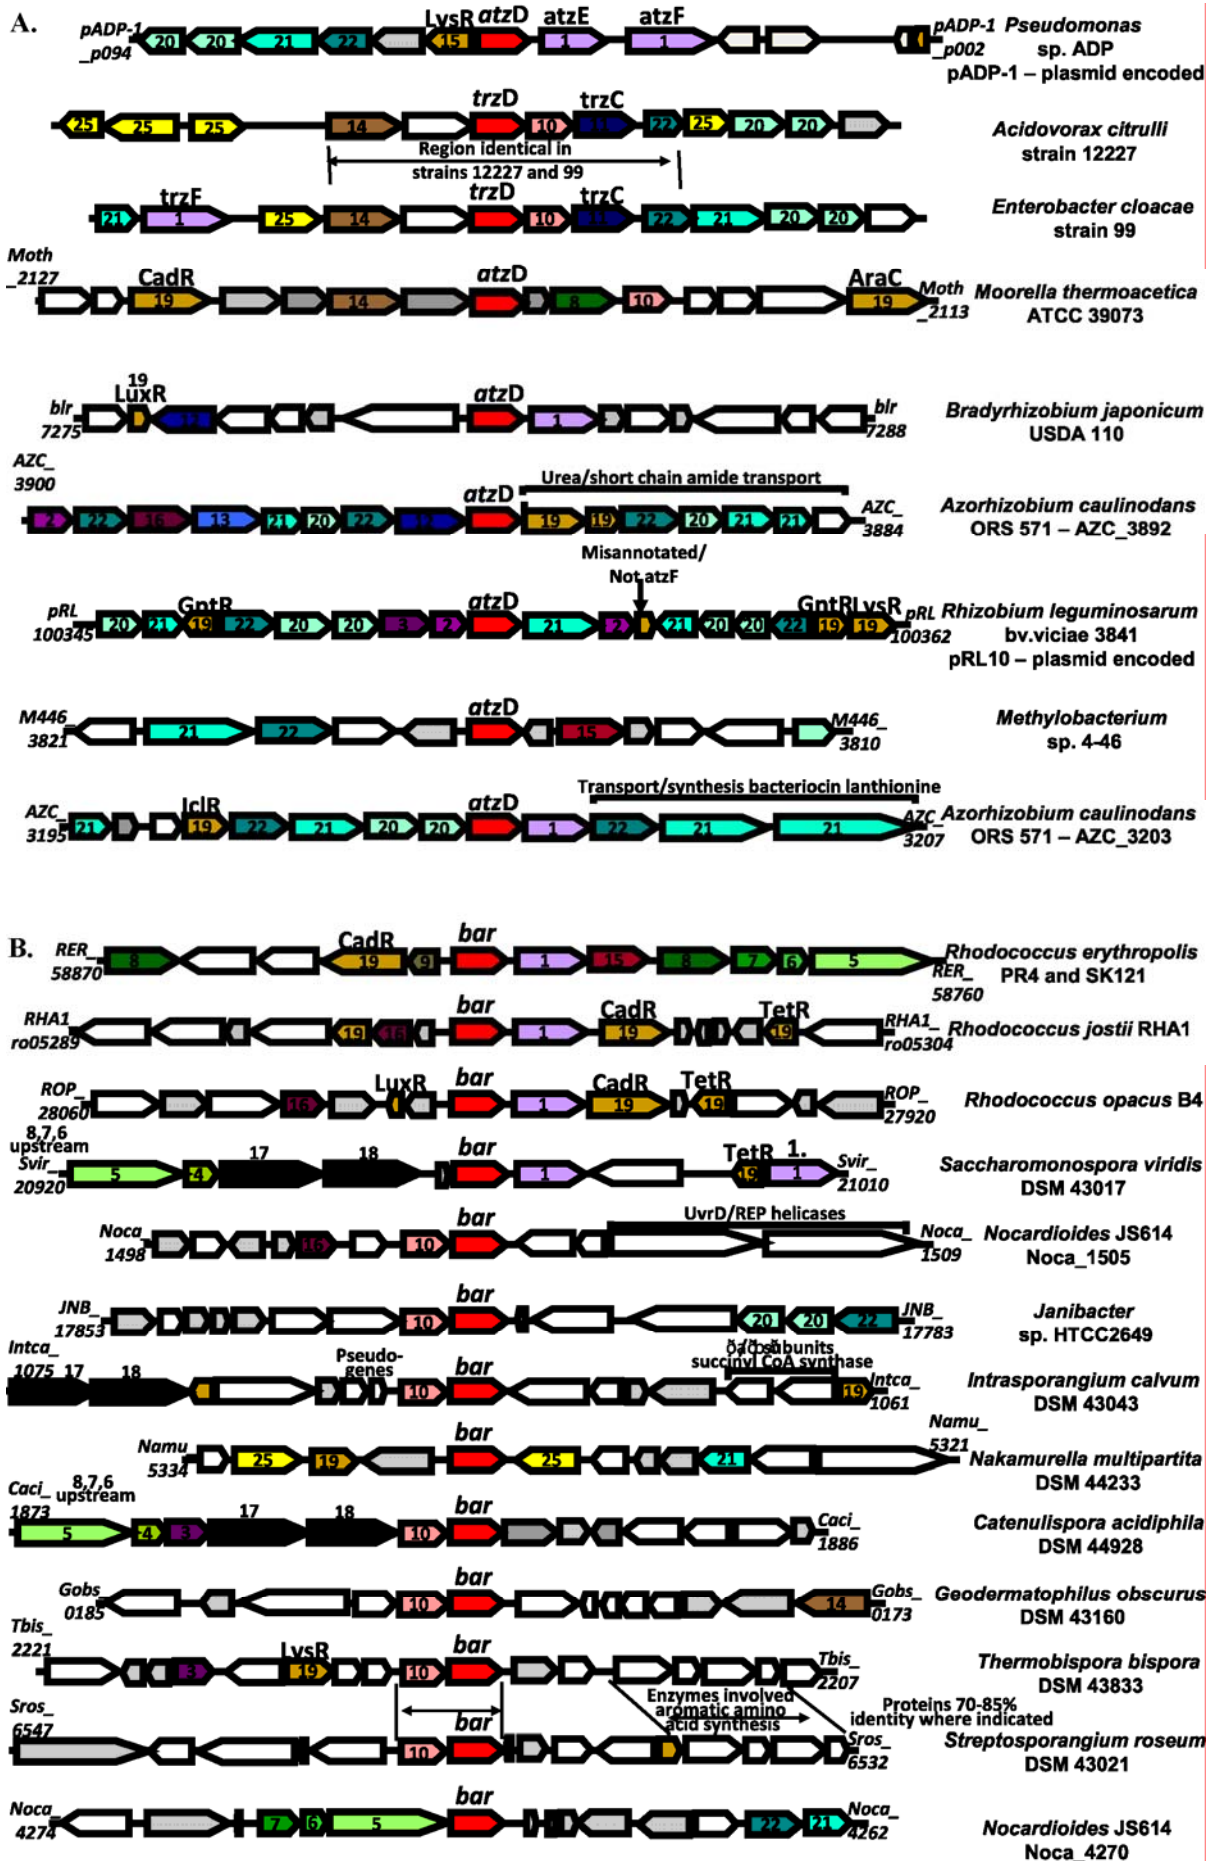

**Gene context of AtzD/barbiturase family members.** Despite the diverse origins of the source organisms and the highly divergent protein sequences, the characterized proteins throughout Clade 1 had only cyanuric acid hydrolase activity, while the only functional member of Clade 2 had barbiturase activity. To determine if additional functional information could be identified by genomic context, the flanking regions of the genes were compared (Fig. S2).

**Gene context – Clade 1.** Group 1 proteins were comprised of proteins found in the phylum Firmicutes. *Moorella thermoacetica* ATCC 39073 was shown previously to exhibit cyanuric acid hydrolase activity (1). Although the *Paenibacillus* and *Bacillus* proteins are also members of the Firmicutes, the tree location of these proteins was method-specific, clustering in either Group 1 or in an adjacent cluster. For this reason they were not included specifically in Group 1. The Firmicutes are diverse in sequence and organismal origins. *Clostridium asparagiforme* DSM 15981 was isolated from human feces, *Paenibacillus* sp. JDR-2 was isolated from sweet gum stem wood buried in surface soil and was shown to degrade hemicellulose, and *Bacillus cellulosilyticus* DSM 2522 was isolated from soil and is known to degrade cellulose. The AtzD homologs in these organisms have only 65, 58, and 41% sequence identity to the *Moorella* cyanuric acid hydrolase, respectively. *Clostridium* and *Bacillus* strains share a common metal-dependent amidohydrolase gene similar to cytosine deaminase (COG0402) located downstream of the *atzD* homolog genes. Members of this amidohydrolase superfamily are responsible for the atrazine degradation pathway upstream of cyanuric acid. It has yet to be determined whether the amidohydrolase protein encoded adjacent to the *atzD* gene in these organisms is producing cyanuric acid.

Gene context information is not available for all organisms in Group 2 since individual genes were sequenced, and the genome sequence is unknown. An operon was found to be present in *P. ADP*, encoding *atzD*, *atzE*, and *atzF* (2). The AtzE and AtzF proteins are members of the amidase signature superfamily and catalyze consecutive reactions, resulting in complete mineralization of cyanuric acid to ammonia and carbon dioxide (Fig. 1). From the sequence information available, an identical transposon associated region, containing *trzD* and its precursor gene *trzC*, was located in both *Acidovorax citrulli* strain 12227 and *Enterobacter cloacae* strain 99 (Fig. S2A). These two genes encoded enzymes that convert ammelide to cyanuric acid and catalyze the subsequent ring-opening reaction. TrzF, a homologous protein to AtzE and AtzF, located upstream of the TrzD protein in *Enterobacter cloacae* strain 99, was shown to catalyze the allophonate hydrolase reaction in that strain (24). A similar homolog is adjacent to the *atzD* gene in *Bradyrhizobium japonicum* USDA 110. This enzyme shares 27% identity to AtzE and 25% identity to AtzF from *P. ADP*, and could possibly be involved in deamination of the products generated by the cyanuric acid hydrolase.

Group 2 contains the only protein found in a eukaryote, the common photosynthetic marine alga *Micromonas* sp. RCC299. Along with the USDA 110 protein, this is the only other Group 2 protein from an organism not isolated for its *s*-triazine degradation ability. The *atzD* homolog gene is located on chromosome 7 and is surrounded by mainly predicted proteins that have no close function to proteins of known function. Unlike the USDA100 protein, there is no evidence of potential *s*-triazine degradation pathway genes located proximal to the *atzD* homolog. This protein has 45, 41, 42, and 32 % identity to AtzD (*Pseudomonas* sp. ADP), TrzD (*Acidovorax citrulli* strain 12227), the *Moorella* cyanuric acid hydrolase, and barbiturase (*Rhodococcus erythropolis* JCM 3132), respectively. Because of its sequence divergence and unique origin, this protein is a good candidate for future functional studies.

Group 3 enzymes were found solely in  $\alpha$ -proteobacteria (Fig. 2). The proteins had 37-55% identity to AtzD, TrzD, the *Moorella* cyanuric acid hydrolase, or barbiturase (Table 1). No functionality was determined among this group prior to this study. It should be noted that although all of these proteins originate in  $\alpha$ -proteobacteria, they are not found in a large range of bacteria and are not present in all organisms in that genera. For instance, *Methylobacterium radiotolerans* JCM 2831 and sp. 4-46 contain AtzD homologs, while the genomes for *Methylobacterium extorquens* AM1 and *M. nodulans* ORS 2060 do not. All of the Group 3 organisms, with the exception of *Oceanicola granulosus* HTCC2516, are involved in nitrogen fixation or are plant pathogens. The relevance of this observation has yet to be determined. The two *Rhizobium* enzymes are encoded on large plasmids and have similar gene context, which include nitrilase and cysteine hydrolase superfamily members directly upstream of *atzD* and a sugar ABC transporter and cysteine hydrolase

superfamily member directly downstream. Likewise, the two *Bradyrhizobium* strains in this group have similar gene context, including a downstream TonB-dependent receptor protein and putative hydroxylase. Gene context for all other organisms in this group are highly divergent (Fig. 4A). *Oceanicola granulosus* HTCC2516 and *Agrobacterium vitis* S4 have one copy of the *atzE/F* protein pair in close proximity to the *atzD* genes. The product of the AtzE-catalyzed reaction is allophanate that will spontaneously decarboxylate to form urea, which many organisms can metabolize. This may account for only one AtzE/F homolog being present in these organisms. The other strains, though lacking AtzE/F homologs, have other potential amidases belonging to the cysteine hydrolase or nitrilase superfamilies in close proximity, which could be catalyzing AtzE/F type reactions.

*Azorhizobium caulinodans* ORS 571 has two cyanuric acid hydrolase/barbiturase family members. The protein encoded by locus AZC\_3892 was placed in Group 3, while locus AZC\_3203 was not placed in either Clade 1 or 2 (Fig. 3). Upstream of the locus AZC\_3892 gene is a metal-dependent amidohydrolase superfamily member similar to proteins that are in the upper pathway in atrazine degradation leading to cyanuric acid production. Downstream of the gene is a urea/short chain amide transport system. A cysteine hydrolase superfamily protein upstream may also be involved in hydrolysis of the AtzD homolog products. Interestingly, the AZC\_3203 locus has one *atzE/F* homolog directly downstream of the *atzD* homolog gene.

The identical protein in *Acidithiobacillus ferrooxidans* ATCC 53993 and ATCC 23270 was placed adjacent to Group3 in Fig. 3, but was not formally included in Group 3 for reasons stated above. These strains are  $\gamma$ -Proteobacteria isolated from acid mine drainage. The AtzD homolog has 34-46% identity with the experimentally determined cyanuric acid hydrolases or barbiturases. It has the ability to fix nitrogen, which is common to most of the Group 3 source organisms. The genomes revealed a combination of genes around the AtzD homolog similar to multiple other groups. There are uracil permease and dehydrogenase genes similar to Group 4 (described below), AtzE/F homologs similar to group 5 (described below) and some examples in Groups 2 and 3, and multiple metal-dependent amidohydrolases, which are homologous to the upstream pathway genes in *s*-triazine degradation. This last example demonstrates the variability of the regions found flanking the Clade 1 genes. While some genes, such as those encoding amidase proteins, were observed adjacent to *atzD* homologs with some frequency, no consistent patterns in the genes flanking Clade 1 *atzD* homologs could be identified.

**Gene context – Clade 2.** Clade 2 consists of proteins found solely in certain Actinobacteria species (Fig. 2). The proteins in this clade share greater than 72% identity with the experimentally determined barbiturase from *Rhodococcus erythropolis* JCM 3132. With such similarity, it might be suspected that these proteins belong in the same group and catalyze the same reaction. However, gene context data suggested the division of this clade into two groups.

Group 4 genes encode proteins that have an upstream enzyme belonging to the amino acid kinase superfamily (Fig. S2). This superfamily includes such enzymes as uridylate, carbamate, asparto-, and acetylglutamate kinase. Uridylate kinase is a bidirectional enzyme that converts uridine 5'-diphosphate (UDP) to uridine 5'-monophosphate (UMP). UMP can then be converted to uridine and then uracil by 5' nucleotidase (EC 3.1.3.5), and uridine nucleosidase (EC 3.2.2.3) or uridine phosphorylase (EC 2.4.2.3) to feed into the pathway for uracil conversion to barbituric acid, and then malonate and urea (Fig. 1). Although the Group 4 proteins have high sequence identity to the known *Rhodococcus erythropolis* JCM 3132 barbiturase (74-86%), no enzyme in this group has been purified and the function of the Group 4 proteins has not been validated. The one organism in this group that lacks the kinase gene is *Nakamurella multipartite* DSM 44233. This organism has transposons flanking the barbiturase homolog, suggesting a mobilization event may have occurred to produce the current gene arrangement.

The second grouping in Clade 2, Group 5, contains the experimentally determined barbiturase from *Rhodococcus erythropolis* JCM 3132 and proteins with greater than 92% identity to this enzyme, and are found within other *Rhodococcus* species and *Saccharomonospora viridis* DSM 43017 (Fig. 3). Gene context data (Fig. S2B) revealed that this group has a conserved amidase homologous to AtzE/AtzF directly after the barbiturase. We propose that, analogous to the cyanuric acid degradation pathway in *P. ADP*, this amidase catalyzes the next step in the barbituric acid degradation pathway, the conversion of ureidomalonic acid to malonate and urea (Fig. 1). Although there is no genome for *Rhodococcus erythropolis* JCM 3132, two other *Rhodococcus erythropolis* species, PR4 and SK121, show conserved uracil/xanthine permease and

uracil/thiamine dehydrogenase (small, middle, and large subunits) in close proximity (Fig. S2B). These enzymes catalyze the transport and conversion of uracil to barbituric acid, respectively. The other *Rhodococcus* strains in this group have these enzymes as well.

Due to a possible gene duplication or horizontal gene transfer event, *Nocardioides* JS614 has two proteins within Clade 2. The protein encoded by gene locus Noca\_4270 has the uracil/thiamine dehydrogenase (small, middle, and large subunits), the enzyme producing barbituric acid, encoded directly upstream of the barbiturase homolog. This protein however shares only 72% identity with the experimentally determined barbiturase. Noca\_1505 shares 86% identity with barbiturase but has the gene context described in Group 4. It is possible that both group 4 and 5 proteins catalyze the barbiturase reaction, that Noca\_4270 encodes a protein having a different function, or that the coding sequence is a pseudogene. Additional experimentation is required to confirm these functions.

*Frankia* sp. Eu11c is an actinobacterium nitrogen-fixing symbiont found within root nodules of woody trees and shrubs. The cyanuric acid hydrolase/barbiturase homolog in this strain has the lowest sequence identity to the enzymes of known function, 36-40%. The genome sequence does not reveal any genes related to cyanuric acid or barbituric acid metabolism. Experimental investigation is required to determine the function of this protein.

**Fig. S2**

Whole family sequence alignment. 80% identity are highlighted by the various colors with the most stringent condition being displayed: 80% identity with a single residues are colored with a grey background, negative residue conservation are red (DE), Ser/Thr are cyan, aliphatic are grey with a yellow background (ILV), positive are blue (HKR), tiny are green (AGS), aromatic are blue with a yellow background (FHWY), charged are pink (DEHKR), small are forest green (ACDGNPSTV), polar are light blue (CDEHKNQRSTV), big residues are dark blue with a peach background (EFHIKLMQRWY), and hydrophobic are black with a yellow background (ACFGHILMTVWY).

```

Janibacter_sp._HTCC2649      ----MP---E AIEVRKVPPLH SVSDASELAK LIDDGVMEAS RVIAIIGKTE GNGGVNDYR
Intrasporangium_calvum_DSM_430 ----MP---E AIEVRKVPPIH SVADASELAR LIDDGVMEAA RVVAIIGKTE GNGGVNDYR
Noca_1505_1Nocardioides_sp._JS ----MP---D AIEVRKVPPIH SVADASELAK LIDDGVMQAE RVIAIIGKTE GNGGVNDYR
PR4_Rhodococcus_erythropolis_P ----MP---E AIEVRKVPPLH SVSDASELAK LIDDGVLEAD RVIAVIIGKTE GNGGVNDYR
SK121_Rhodococcus_erythropolis ----MP---E AIEVRKVPPLH SVSDASELAK LIDDGVLEAD RVIAVIIGKTE GNGGVNDYR
Barbiturase_Rhodococcus_erythr ----MP---E AIEVRKVPPLH SVSDASELAK LIDDGVLEAD RVIAVIIGKTE GNGGVNDYR
jostii_RHA1_Rhodococcus_jostii ----MP---D AIEVRKVPPLH SVSDAGELAK LIDDGVLEAD RVVAVIIGKTE GNGGVNDYR
B4_Rhodococcus_opacus_B4       ----MP---E AIEVRKVPPLH SVSDAGELAK LIDDGVLEAD RVVAVIIGKTE GNGGVNDYR
Saccharomonospora_viridis_DSM_ ----MP---D AIEVRKVPPIH SVSDASELAK LIDDGVMEAD RIIIAIIGKTE GNGGVNDYR
Nakamurella_multipartita_DSM_4 (11)TP---E PIEVRKIPLH SVSDASELTA LFDAGITDAD RVVAVIIGKTE GNGGVNDYR
Catenulispora_acidiphila_DSM_4 ----MP---E AIEVRKVPPLH HVSDDASGLAE LITAGVVEAD RVVAVVIGKTE GNGGVNDYR
Streptosporangium_roseum_DSM_4 ----MP---E PIEVRKVAIE SVTDASGLTR LIDDGVIEAH RVLAVIGKTE GNGGVNDYR
Thermobispora_bispora_DSM_4383 ----MP---D PIEVRKVPPIE SVTDASGLAK LIDEGIIEAD RVLAVIGKTE GNGGVNDYR
Geodermatophilus_obscurus_DSM_ ----MP---A PIEVRKVPPLH NVSDASELAK LIDDGVMEAD RVVAVIIGKTE GNGGVNDYR
Noca_4270_2Nocardioides_sp._JS ----MT---R PIEVRKVPPIE HVSDDAAGLAD LIDAGVFSAD DVIAVVIGKTE GNGGVNDYR
Aminobacter_aminovorans      -----
Chelatobacter_heintzii       -----
TRZD_Enterobacter_cloacae     -----M QAQVFRVPMS NPADVSGVAK LIDEGVIRAE EVVAVLGGKTE GNGCVNDFR
TrzD_Acidovorax_citrullii     -----M QAQVFRVPMS NPADVSGVAK LIDEGVIRAE EVVAVLGGKTE GNGCVNDFR
Moorella_thermoacetica_ATCC_39 -----MQ KVEVFRIPTA SPDDISGLAT LIDSGKINPA EIVAILGGKTE GNGCVNDFR
Clostridium_asparagiforme_DSM_ -----M KIDVFKIEMS APDDVRELKK LIDAGEVDPG EIIAVLGGKTE GNGCVNDFR
AD25_Arthrobacter_sp._AD25    -----MY HIDVFRIPCH SPGDTSGLED LIETGRVAPA DIVAVMGGKTE GNGCVNDFR
Comamonas_sp._A2             -----
gi|75369013|sp|Q6PMK9|Q6PMK9_9 -----MY HIDVFRIPCH SPGDTSGLED LIETGRVAPA DIVAVMGGKTE GNGCVNDFR
AtzD_ADP_Pseudomonas_sp._ADP -----MY HIDVFRIPCH SPGDTSGLED LIETGRVAPA DIVAVMGGKTE GNGCVNDFR
Pseudomonas_nitroreducens     ----- --GDTSGLED LIETGRVAPA DIVAVMGGKTE GNGCVNDFR
USDA_110_Bradyrhizobium_japoni ----MR--TT SVGVFKIVTK GPGDVSGLMA MFGSGAIDPK SILAVLGGKTE GNGCVNDFR
viciae_3841_Rhizobium_legumino ----MP--SL RAHVFRVPAD GPDDVAGVEA LFASG-LQAN NIVAVLGGKTE GNGCVNDFR
trifolii_WSM1325_Rhizobium_leg ----MP--SL RAHVFRVPAD GPDDVAGVEA LFASG-LQAN NVVAVLGGKTE GNGCVNDFR
Agrobacterium_vitis_S4       ---MTT--CF RASVYRVAAS APDDISGVEA LTGSG-LNPH SIVAVLGGKTE GNGCVNDFR
ORS278_Bradyrhizobium_sp._ORS2 ----MPTLR RAHVHRLPMR SPDDVGALEA AIVSGAIDPA GIVAILGGKTE GNGCVNDFR
BTai1_Bradyrhizobium_sp._BTai1 ----MPTALR RATVHRLPMR SPDDVGALEA ATAQGAIDPA GIIAILGGKTE GNGCVNDFR
4_46_Methylobacterium_sp._4_46 ----MP---R RAELIRLPLMA APDDVSAIAA SLRDGRLDPG DVVAVFAKTE GNGCVNDFR
AZC_3892_2Azorhizobium_caulino ----MP---- IAKVHRIATA SPDDVSGLAA AITATGAIAPA GILAIIFGGKTE GNGCVNDFSR
Paenibacillus_sp._JDR-2      -----MM KCSVFKVPAR SPNDTAAALQR YIDESLINPK DVVAVLGGKTE GNGCVNDFR
Oceanicola_granulosus_HTCC2516 -----M RADVIRFDLP DPGDVSAALAG AIDAGRVDPG RIVAIIGKTEH ENGLVNDYR
Acidithiobacillus_ferrooxidans -----M RTSVYRFFTQ DPADVSGLVR ATAEGVINPQ SIVAIIGKTE GNGMVNDFR
JCM_2831_Methylobacterium_radi -----MP ECLVFRVPAQ HPADVSGVMD LVTSGTVGAP EIVAIIFGGKTE GNGCVNDFR
Micromonas_sp._RCC299        ---VLDKP VAVVAVVDTA HPGDTGPLER WMDAN--PLA DILCVLGGKTE GNGCVNDFR
AZC_3203_1Azorhizobium_caulino -----M KVGVHKLAMS APGDVSELAA LIETGAVNPR EIVAVLGGKTE GNGGANDFR
Bacillus_cellulosilyticus_DSM_ -----M NYELIRCDMD HPGDVSAALAK LLNEEEISAE SIRAIIAQTE GDG----YSR
Frankia_sp._Eu1c             (10)RSARYP KASMHVVPML APNDTAAFRA LFASGAVDPA SVVALIAKSE GSGLHNDHAR
Consensus/80%                ...MMPH... .hpVb+lshp sssDst.l.. blssG.lps. pllAlllGKTE GNGsVNDaTR

```



|                                |             |             |             |             |            |            |     |
|--------------------------------|-------------|-------------|-------------|-------------|------------|------------|-----|
| Janibacter_sp._HTCC2649        | IIADRAFREV  | LIEKG-APA-  | ----DQVKQV  | PIVWSSGGD   | IIISPHATT  | TVP----    | ADK |
| Intrasporangium_calvum_DSM_430 | IIADRAFREV  | LVEKG-APA-  | ----DQVSQI  | PIVWSSGGD   | VISPHATT   | TLP----    | ADR |
| Noca_1505_1Nocardioides_sp._JS | IIADRAFREV  | LVEKG-APA-  | ----EQVKQV  | PIVWSSGGD   | VISPHATT   | TVP----    | PED |
| PR4_Rhodococcus_erythropolis_P | IIADRAFREV  | LSAKGNRSP-  | ----EEVAEV  | PIVWSSGGD   | VISPHATT   | TVP----    | ADK |
| SK121_Rhodococcus_erythropolis | IIADRAFREV  | LSAKGNRSP-  | ----EEVAEV  | PIVWSSGGD   | VISPHATT   | TVP----    | ADK |
| Barbiturase_Rhodococcus_erythr | IIADRAFREV  | LSAKGNRSP-  | ----EEVAEV  | PIVWSSGGD   | VISPHATT   | TVP----    | ADK |
| jostii_RHA1_Rhodococcus_jostii | IIADRAFREV  | LSAKGRRSA-  | ----DEVAEV  | PIVWSSGGD   | VISPHATT   | TVP----    | AGK |
| B4_Rhodococcus_opacus_B4       | IIADRAFREV  | LSAKGSRST-  | ----DEVAQV  | PIVWSSGGD   | VISPHATT   | TVP----    | AEK |
| Saccharomonospora_viridis_DSM_ | IIADRAFREV  | IVEKGSRTM-  | ----EVRQI   | PIVWSSGGD   | VISPHATT   | TVP----    | EDR |
| Nakamurella_multipartita_DSM_4 | IIADRAFREA  | IVAGGTRTL-  | ----DQVRQI  | PIVWSSGGD   | VLSPHATT   | TVP----    | ADS |
| Catenulispora_acidiphila_DSM_4 | IIADRAFRET  | LMRLGTRSE-  | ----AEVAEV  | PIVWSSGGD   | VLSPHATT   | TTD----    | AEP |
| Streptosporangium_roseum_DSM_4 | IIADRAFREV  | LAAKGHPSP-  | ----ES---V  | PLVWSSGGD   | VLSPHATT   | TTA----    | DAE |
| Thermobispora_bispora_DSM_4383 | IIADRAFREDV | LVQKGTRTP-  | ----EEVAQV  | PLVWSSGGD   | VLSPHATT   | TVD----    | PAK |
| Geodermatophilus_obscurus_DSM_ | IIADRAFREV  | LLEKGTRSK-  | ----EEVGEI  | PIVWSSGGD   | VISPHATT   | TLP----    | EDA |
| Noca_4270_2Nocardioides_sp._JS | IIISTHAYRAV | LLEKGRTRSK- | ----EEVAQV  | PLVWSSGGD   | VISPHATT   | YAP----    | EGR |
| Aminobacter_aminovorans        | -----       | -----GVSR-  | ----QEVGERI | AFVMSGGTEG  | VMAPHCTIT  | VQKTDNK    | QKT |
| Chelatobacter_heintzii         | -----       | -----GVSR-  | ----QEVGERI | AFVMSGGTEG  | VMAPHCTIT  | VQKTDNK    | QKT |
| TRZD_Enterobacter_cloacae      | GYTLAFKVVY  | FSEKLGVSR-  | ----QEVGERI | AFVMSGGTEG  | VMAPHCTIT  | VQKTDNK    | QKT |
| TrzD_Acidovorax_citrulli       | GYTLAFKVVY  | FSEKLGVSR-  | ----QEVGERI | AFVMSGGTEG  | VMAPHCTIT  | VQKTDNK    | QKT |
| Moorella_thermoacetica_ATCC_39 | GFATQSLAMY  | LAEKLGISR-  | ----BEVVKV  | AFVMSGGTEG  | VMTPHITV   | RKDVQ---   | EP  |
| Clostridium_asparagiforme_DSM_ | ALSTVFSRSL  | IMAETGWSE-  | ----AEVSKV  | AFVMSGGTEG  | VMSPHATT   | CHEDG---   | AA  |
| AD25_Arthrobacter_sp._AD25     | EYATAMLAAC  | LGRHLQLPP-  | ----HEVEKRV | AFVMSGGTEG  | VLSPHHTV   | RRP----    | AID |
| Comamonas_sp._A2               | -YATAMLAAC  | LGRHLQLPP-  | ----HEVEKRV | AFVMSGGTEG  | VLSPHHTV   | RRP----    | AID |
| gi 75369013 sp Q6PMK9 Q6PMK9_9 | EYATAMLAAC  | LGRHLQLPP-  | ----HEVEKRV | AFVMSGGTEG  | VLSPHHTV   | RRP----    | AID |
| AtzD_ADP_Pseudomonas_sp._ADP   | EYATAMLAAC  | LGRHLQLPP-  | ----HEVEKRV | AFVMSGGTEG  | VLSPHHTV   | RRP----    | AID |
| Pseudomonas_nitroreducens      | EYATAMLAAC  | LGRHLQLPP-  | ----HEVEKRV | AFVMSGGTEG  | VLSPHHTV   | RRP----    | AID |
| USDA_110_Bradyrhizobium_japoni | EYAVAACTA   | LAPQLGLSP-  | ----BEVEQRI | AFVMSGGTEG  | VLSPHITV   | RRE----    | VER |
| viciae_3841_Rhizobium_legumino | GYATRSFETL  | FSRYG-----  | -----VDGV   | SIIMSGGTEG  | ALSPHWTV   | RET----    | VET |
| trifolii_WSM1325_Rhizobium_leg | GYATRSFETL  | FSRYG-----  | -----VDGV   | SIIMSGGTEG  | ALSPHWTV   | RET----    | VET |
| Agrobacterium_vitis_S4         | GFATATFEQL  | FARLC-----  | -----VTGV   | SIVMSGGTEG  | ALSPHWTV   | RER----    | VEA |
| ORS278_Bradyrhizobium_sp._ORS2 | AFAVRSLETL  | LGRHLQAD--  | ----AVRQI   | AMVMSGGTEG  | ALSPHMIV   | AR--T--    | GDD |
| BTAi1_Bradyrhizobium_sp._BTAi1 | AFAVRSLOTL  | LGRHVDGD--  | ----AINQI   | AMVMSGGTEG  | ALSPHMIV   | ARDAS--    | GET |
| 4_46_Methylobacterium_sp._4_46 | PLAVQALRGL  | FGPLIGEA--  | ----ALGRI   | AMVMSGGTEG  | GLSPHWLV   | AR-----    | EAA |
| AZC_3892_2Azorhizobium_caulino | GFAVQSLQML  | LRGHMG-A--  | ----AADEV   | CLVMSGGTEG  | GMSPHFLV   | RA-----    | EGN |
| Paenibacillus_sp._JDR-2        | GFAVLALKNL  | FASYK-EA--  | ----TAEPV   | SYIMSGGTEG  | ILSPHFSV   | RSE-S--    | LDD |
| Oceanicola_granulosus_HTCC2516 | GYLTQSLKLL  | LAARTGEAE-  | ---AGLQARI  | PMVFSGGVEG  | VLSPHFIV   | VHD----    | DED |
| Acidithiobacillus_ferrooxidans | TLAMMAVSQV  | LATHLDCRP-  | ---BLVEERV  | VLSFSGGSEG  | VAAPHILV   | VSGRA--    | AEQ |
| JCM_2831_Methylobacterium_radi | QLAVMALETA  | LATALGCTP-  | ---AEGARI   | ALVMSGGTEG  | GLSPHFLI   | RRE----    | GPA |
| Micromonas_sp._RCC299          | GYATSAIQAA  | LGRVRSRRM(  | 12)SSFTADP  | AIIMSGGTEG  | VLCPHFIV   | NSWDE--    | ADA |
| AZC_3203_1Azorhizobium_caulino | GLATLSYQLL  | LARHLGLSP-  | ---BEVGQRI  | AFVWSSGGTEG | VLSPHATT   | RAP----    | DD  |
| Bacillus_cellulosilyticus_DSM_ | GYATLAFQLL  | LSEKLNISQ-- | ---QEVFDTI  | PMMICKTIGS  | LMTPHYTL   | EKED---    | VEK |
| Frankia_sp._Eu1c               | VFADVSLRTA  | LAEARGCP--  | ---EDLADSV  | TVAVSSGGSPS | VISPHVTVT  | QEWVADLPAG |     |
| Consensus/80%                  | hbAs.tbp.h  | ls.bh..s..  | ..Vp...pl   | sblbSSGGT-G | lbSPHh*1Fs | ...ssNK... |     |





|                                |                     |                                       |                             |      |            |                                      |      |                           |     |
|--------------------------------|---------------------|---------------------------------------|-----------------------------|------|------------|--------------------------------------|------|---------------------------|-----|
| Janibacter_sp._HTCC2649        | TKT <b>P</b> LLTIHT | IRD <b>A</b> KSR <b>G</b> QK          | VWTEHT                      | ---H | ESMDLSNGTT | G <b>L</b> GI <b>A</b> VA <b>L</b> G | ---  | E <b>I</b> EMP            | --- |
| Intrasporangium_calvum_DSM_430 | TKT <b>P</b> LLTIHT | IRD <b>A</b> KSR <b>G</b> MK          | VWTEHT                      | ---H | ESMDLSNGTT | G <b>L</b> GV <b>A</b> VA <b>L</b> G | ---  | E <b>I</b> EMP            | --- |
| Noca_1505_1Nocardioides_sp._JS | TKT <b>P</b> LLTIHT | IRD <b>A</b> KSR <b>G</b> KT          | VWTEHT                      | ---H | ESMDLSNGCT | AL <b>G</b> IA <b>V</b> AL <b>G</b>  | ---  | E <b>I</b> EMP            | --- |
| PR4_Rhodococcus_erythropolis_P | TKT <b>P</b> LLTIHT | IRD <b>A</b> KSR <b>G</b> KT          | VWTEQT                      | ---H | ESMDLSNGT  | AL <b>G</b> IA <b>V</b> AL <b>G</b>  | ---  | E <b>I</b> DMP            | --- |
| SK121_Rhodococcus_erythropolis | TKT <b>P</b> LLTIHT | IRD <b>A</b> KSR <b>G</b> KT          | VWTEQT                      | ---H | ESMDLSNGT  | AL <b>G</b> IA <b>V</b> AL <b>G</b>  | ---  | E <b>I</b> DMP            | --- |
| Barbiturase_Rhodococcus_erythr | TKT <b>P</b> LLTIHT | IRD <b>A</b> KSR <b>G</b> KT          | VWTEQT                      | ---H | ESMDLSNGT  | AL <b>G</b> IA <b>V</b> AL <b>G</b>  | ---  | E <b>I</b> DMP            | --- |
| jostii_RHA1_Rhodococcus_jostii | TKT <b>P</b> LLTIHT | IRD <b>A</b> KSR <b>G</b> ET          | VWTEHT                      | ---H | ESMDLSNGVT | AL <b>G</b> IA <b>V</b> AL <b>G</b>  | ---  | E <b>I</b> DMP            | --- |
| B4_Rhodococcus_opacus_B4       | TKT <b>P</b> LLTIHT | IRD <b>A</b> KSR <b>G</b> ET          | VWTEHT                      | ---H | ESMDLSNGVT | AL <b>G</b> IA <b>V</b> AL <b>G</b>  | ---  | E <b>I</b> DMP            | --- |
| Saccharomonospora_viridis_DSM_ | TKT <b>P</b> LLTIDT | IRD <b>A</b> KSR <b>G</b> KS          | VWTEDT                      | ---L | ESMDLSNGTT | G <b>L</b> GI <b>A</b> VA <b>L</b> G | ---  | E <b>I</b> DMP            | --- |
| Nakamurella_multipartita_DSM_4 | TKT <b>P</b> LLTIHT | IRD <b>A</b> K <b>Q</b> R <b>G</b> QT | VWTEHT                      | ---H | ESMDLSNGCT | AL <b>G</b> VA <b>V</b> AL <b>G</b>  | ---  | E <b>I</b> EMP            | --- |
| Catenulispora_acidiphila_DSM_4 | TKT <b>P</b> LLTIQT | IRE <b>A</b> K <b>A</b> R <b>G</b> ET | VWTEHT                      | ---H | ESMDLSNGCT | AL <b>G</b> IA <b>V</b> AL <b>G</b>  | ---  | E <b>V</b> EMP            | --- |
| Streptosporangium_roseum_DSM_4 | TKT <b>P</b> LLTLAT | IND <b>A</b> KSR <b>G</b> KD          | VVIEDT                      | ---G | PSMDISNSTT | AL <b>G</b> VA <b>V</b> AL <b>G</b>  | ---  | E <b>I</b> EMP            | --- |
| Thermobispora_bispora_DSM_4383 | TKT <b>P</b> LLTLET | IND <b>A</b> KRR <b>G</b> HT          | VVTEDT                      | ---L | KSMDISNSTT | AL <b>G</b> IA <b>V</b> AL <b>G</b>  | ---  | E <b>I</b> EMP            | --- |
| Geodermatophilus_obscurus_DSM_ | TKT <b>P</b> LLTIET | IRD <b>A</b> K <b>A</b> R <b>G</b> EE | TYDEP                       | ---H | ESMDLSNETT | AL <b>G</b> IA <b>V</b> AL <b>G</b>  | ---  | E <b>I</b> DMP            | --- |
| Noca_4270_2Nocardioides_sp._JS | TKT <b>P</b> LLVQDT | IND <b>A</b> ER <b>R</b> GET          | VYTHNT                      | ---L | ESMDVSNATT | AL <b>G</b> IA <b>V</b> AL <b>G</b>  | ---  | E <b>I</b> EMP            | --- |
| Aminobacter_aminovorans        | VKC <b>P</b> LLTAGR | MHD <b>A</b> VER <b>G</b> HT          | VATEDT                      | ---Y | ESMGYSRGAS | AL <b>G</b> IA <b>L</b> AL <b>G</b>  | ---  | E <b>V</b> EKANL          | --- |
| Chelatobacter_heintzii         | VKC <b>P</b> LLTAGR | MHD <b>A</b> VER <b>G</b> HT          | VATEDT                      | ---Y | ESMGYSRGAS | AL <b>G</b> IA <b>L</b> AL <b>G</b>  | ---  | E <b>V</b> EKANL          | --- |
| TRZD_Enterobacter_cloacae      | VKC <b>P</b> LLTAGR | MHD <b>A</b> VER <b>G</b> HT          | VATEDT                      | ---Y | ESMGYSRGAS | AL <b>G</b> IA <b>L</b> AL <b>G</b>  | ---  | E <b>V</b> EKANL          | --- |
| TrzD_Acidovorax_citrulli       | VKC <b>P</b> LLTAGR | MHD <b>A</b> VER <b>G</b> HT          | VATEDT                      | ---Y | ESMGYSRGAS | AL <b>G</b> IA <b>L</b> AL <b>G</b>  | ---  | E <b>V</b> EKANL          | --- |
| Moorella_thermoacetica_ATCC_39 | IKC <b>P</b> LLTAER | IED <b>A</b> KRR <b>G</b> KD          | VVVNDT                      | ---Y | KSMAYSRGAS | AL <b>G</b> VA <b>L</b> AL <b>G</b>  | ---  | E <b>I</b> SADKI          | --- |
| Clostridium_asparagiforme_DSM_ | IKC <b>P</b> LLTSER | ILD <b>A</b> KSR <b>G</b> KD          | VVVHDT                      | ---Y | ESMGYNRGAS | AL <b>G</b> VA <b>I</b> AL <b>G</b>  | ---  | E <b>I</b> PAAEV          | --- |
| AD25_Arthrobacter_sp._AD25     | VKC <b>P</b> LLTPAK | IAS <b>A</b> RSR <b>G</b> CA          | PVTTDT                      | ---Y | ESMGYSRGAS | AL <b>G</b> IA <b>L</b> A <b>T</b> E | ---  | E <b>V</b> PSFML          | --- |
| Comamonas_sp._A2               | VKC <b>P</b> LLTPAK | IAS <b>A</b> RSR <b>G</b> CA          | PVTTDT                      | ---Y | ESMGYSRGAS | AL <b>G</b> IA <b>L</b> A <b>T</b> E | ---  | E <b>V</b> PSFML          | --- |
| gi 75369013 sp Q6PMK9 Q6PMK9_9 | VKC <b>P</b> LLTPAK | IAS <b>A</b> RSR <b>G</b> CA          | PVTTDT                      | ---Y | ESMGYSRGAS | AL <b>G</b> IA <b>L</b> A <b>T</b> E | ---  | E <b>V</b> PSFML          | --- |
| AtzD_ADP_Pseudomonas_sp._ADP   | VKC <b>P</b> LLTPAK | IAS <b>A</b> RSR <b>G</b> CA          | PVTTDT                      | ---Y | ES         | ---                                  | ---  | ---                       | --- |
| Pseudomonas_nitroreducens      | VKC <b>P</b> LLTPAK | IAS <b>A</b> RSR <b>G</b> CA          | PVTTDT                      | ---Y | ES         | ---                                  | ---  | ---                       | --- |
| USDA_110_Bradyrhizobium_japoni | IKC <b>P</b> LLTSDR | VEA <b>A</b> SAR <b>G</b> NK          | TAT TSA                     | ---Y | GSMAYSRGAS | AL <b>G</b> VA <b>V</b> AL <b>G</b>  | ---  | E <b>T</b> G-S <b>D</b> I | --- |
| viciae_3841_Rhizobium_legumino | IKC <b>P</b> LLTSRR | IAE <b>A</b> EA <b>A</b> GRT          | VATHDT                      | ---L | KSMGLSRGAS | AL <b>G</b> VA <b>V</b> AL <b>G</b>  | ---  | E <b>I</b> DATSI          | --- |
| trifolii_WSM1325_Rhizobium_leg | IKC <b>P</b> LLTSRR | IAE <b>A</b> EA <b>A</b> GRT          | VATHDT                      | ---L | KSMGLSRGAS | AL <b>G</b> VA <b>V</b> AL <b>G</b>  | ---  | E <b>I</b> DATSI          | --- |
| Agrobacterium_vitis_S4         | IKC <b>P</b> LLTSAR | VAE <b>A</b> QAR <b>G</b> KR          | TVIAET                      | ---L | KSMGYSRGAS | AL <b>G</b> VA <b>V</b> AL <b>G</b>  | ---  | E <b>L</b> DMDDI          | --- |
| ORS278_Bradyrhizobium_sp._ORS2 | VKC <b>P</b> LLTMER | IEA <b>A</b> EA <b>R</b> GAR          | TAVRDT                      | ---L | KSMGFSRGAS | AL <b>G</b> VA <b>V</b> AL <b>G</b>  | ---  | E <b>L</b> AFDEL          | --- |
| BTAil_Bradyrhizobium_sp._BTAil | VKC <b>P</b> LLTMER | IEA <b>A</b> EA <b>R</b> GTT          | TAVRDT                      | ---L | KSMFSRGAS  | AL <b>G</b> A <b>V</b> AL <b>G</b>   | ---  | E <b>L</b> TLSDL          | --- |
| 4_46_Methylobacterium_sp._4_46 | VKC <b>P</b> LLTSER | IGA <b>A</b> LAR <b>G</b> AA          | PATRDT                      | ---L | KSMGLSRAAA | AL <b>G</b> A <b>A</b> LAL <b>G</b>  | ---  | E <b>V</b> PAAAI          | --- |
| AZC_3892_2Azorhizobium_caulino | VKC <b>P</b> LLTAMR | VKE <b>A</b> EA <b>R</b> GAT          | TATSDT                      | ---L | KSMGLSRGAS | AL <b>G</b> IA <b>L</b> AL <b>G</b>  | ---  | E <b>V</b> AEDAL          | --- |
| Paenibacillus_sp._JDR-2        | IKC <b>P</b> LLTAEQ | VQE <b>A</b> NLR <b>G</b> AS          | TVTEDI                      | ---Y | KSMGYSRGAS | AL <b>G</b> A <b>V</b> AL <b>G</b>   | ---  | E <b>I</b> QRERL          | --- |
| Oceanicola_granulosus_HTCC2516 | VKG <b>P</b> AFAQA- | --DLA <b>G</b> AAD <b>G</b>           | LASDDP                      | ---G | KLWGFCAA   | AL <b>G</b> VA <b>R</b> AL <b>G</b>  | ---  | E <b>V</b> PAAEA          | --- |
| Acidithiobacillus_ferroxidans  | IKG <b>P</b> AIPAP- | --DSTTT <b>C</b> N-                   | VRDEHL                      | ---R | CDMAWSRGAS | AL <b>G</b> VA <b>L</b> AL <b>G</b>  | ---  | E <b>V</b> TESEL          | --- |
| JCM_2831_Methylobacterium_radi | VKC <b>P</b> LLTSAR | IAD <b>A</b> AA <b>R</b> CHG          | VATHDT                      | ---Y | ASMGLSRGAS | AL <b>G</b> IA <b>L</b> AL <b>G</b>  | ---  | E <b>V</b> DREQI          | --- |
| Micromonas_sp._RCC299          | IKC <b>P</b> LLTPER | IAE <b>A</b> AA <b>R</b> GET          | CAT TDC                     | ---Y | ESMALSRGAS | SL <b>G</b> AM <b>V</b> A <b>V</b> E | (10) | DARVDDA                   | --- |
| AZC_3203_1Azorhizobium_caulino | VKG <b>P</b> LLTPAT | IAD <b>A</b> DRR <b>G</b> AR          | LVTRDP                      | ---N | GSKPYARGAM | AL <b>G</b> VA <b>L</b> AL <b>G</b>  | ---  | E <b>V</b> AAERI          | --- |
| Bacillus_cellulosilyticus_DSM_ | VKC <b>P</b> WGVGG- | ---                                   | ---                         | ---  | SLAKATS    | AL <b>G</b> SA <b>V</b> A <b>L</b> K | ---  | E <b>V</b> DREVI          | --- |
| Frankia_sp._Eu1lc              | VKG <b>P</b> ALSSRA | VAD <b>A</b> LSR <b>G</b> KT          | VV <b>T</b> GD <b>Y</b> (4) | M    | GSMCWSNDAS | AL <b>G</b> VA <b>V</b> AL <b>G</b>  | ---  | E <b>V</b> KRDLV          | --- |
| Consensus/80%                  | hKsPLLT..p          | l.sA..RGps                            | sh*pcT...b                  |      | cSMsbSpGs* | AL <b>G</b> IA <b>L</b> AL <b>G</b>  | ...  | E <b>I</b> ..s.l          | --- |

|                                 |             |             |             |            |            |            |
|---------------------------------|-------------|-------------|-------------|------------|------------|------------|
| Janibacter_sp._HTCC2649         | TDADVMHNR   | FSVASCSS    | VELDQAQIV   | VVG---NARG | VGGRYRIGHS | VMRDALDADG |
| Intrasporangium_calvum_DSM_430  | SDEDIMHNR   | YSVASCSS    | VELDQAQVV   | VVG---NTRG | IGGRYRIGHS | VMRDALDADG |
| Noca_1505_1Nocardioides_sp._JS  | SDEDVMHDR   | YSVASCSS    | VELDQAQVV   | VVG---NAPG | VGGRYRIGHS | VMKDALDQDG |
| PR4_Rhodococcus_erythropolis_P  | TDEDVMHSRE  | FSVASCSS    | VELDRAQIV   | VVG---NARG | VGGRYRIGHS | VMKDPLDQDG |
| SK121_Rhodococcus_erythropolis  | TDEDVMHSRE  | FSVASCSS    | VELDRAQIV   | VVG---NARG | VGGRYRIGHS | VMKDPLDQDG |
| Barbiturase_Rhodococcus_erythr  | TDEDVMHSRE  | FSVASCSS    | VELDRAQIV   | VVG---NARG | VGGRYRIGHS | VMKDPLDQDG |
| jostii_RHA1_Rhodococcus_jostii  | SDADVMHRR   | FSVASCSS    | VELDRAQVV   | VVG---NARG | IGGRYRIGHS | VMKDPLDQDG |
| B4_Rhodococcus_opacus_B4        | DDADVMHRR   | YSVASCSS    | VELDRAQIV   | VVG---NARG | IGGRYRIGHS | VMTDPLDQDG |
| Saccharomonospora_viridis_DSM_4 | SDEDVTKNR   | FSVASCSS    | VELDRAQIV   | VVG---NARG | VGGRYRIGHS | VMQDALDQDG |
| Nakamurella_multipartita_DSM_4  | GDADVMHDR   | FSVASCSS    | VELDQAQVV   | VVG---NARG | VGGRYRIGHS | VMQDALDADG |
| Catenulispora_acidiphila_DSM_4  | SDEAVLHDRA  | YSVASCSS    | VELDRAQVV   | VVG---NASG | VGGRYRIGHA | VMRDALDAEG |
| Streptosporangium_roseum_DSM_4  | TADQIHRDLS  | YSVASCSS    | VELDRAQIV   | VVG---NVRG | IGGRYRIGHS | VMKDALDADG |
| Thermobispora_bispora_DSM_4383  | REDQIHRDLS  | YSVASCSS    | VELDRAQIV   | VVG---NVRG | IGGRYRIGHS | VMKDALDADG |
| Geodermatophilus_obscurus_DSM_  | EQGQVMRDLS  | FSVASCSS    | VELDRAQIV   | VVG---NARG | HGGAYRIGHS | VMRDALDQDG |
| Noca_4270_2Nocardioides_sp._JS  | TAEQIFHDLS  | YSVASCSS    | VELDQAQIV   | VVG---NARG | VGGFRVGHG  | IMKDALDMDG |
| Aminobacter_aminovorans         | SDEVITADYS  | YSVASTSA    | GIELMNEIIV  | VVG---NSRA | WGGDL----  | -----      |
| Chelatobacter_heintzii          | SDEVITADYS  | YSVASTSA    | GIELMNEIIV  | VVG---NSRA | WGGDL----  | -----      |
| TRZD_Enterobacter_cloacae       | SDEVITADYS  | YSVASTSA    | GIELMNEIIV  | VVG---NSRA | WGGDLVIGHA | EMKDALDGAA |
| TrzD_Acidovorax_citrulli        | SDEVITADYS  | YSVASTSA    | GIELMNEIIV  | VVG---NSRA | WGGDLVIGHA | EMKDALDGAA |
| Moorella_thermoacetica_ATCC_39  | SNEAICHHDWN | YSVASTSA    | VELLNDEIIV  | VVG---NSTN | SASDLVIGHS | VMKDALDADA |
| Clostridium_asparagiforme_DSM_  | SQETICHDYS  | YSKVASTSA   | VELLNCEIIV  | VVG---NSVN | STSDYRIGHS | VMEDALDFKA |
| AD25_Arthrobacter_sp._AD25      | VDESVLNDWS  | SSSLASASA   | GIELEHNVVI  | VVG---MSEQ | ATSELVTAHG | VMSDALDAAS |
| Comamonas_sp._A2                | VDESVLNDWS  | S-----      | -----       | -----      | -----      | -----      |
| gi 75369013 sp Q6PMK9 Q6PMK9_9  | VDESVLNDWS  | SSSLASASA   | GIELEHNVVI  | VVG---MSEQ | ATSELVTAHG | VMSDALDAAS |
| AtzD_ADP_Pseudomonas_sp._ADP    | VDESVLNDWS  | SSSLASASA   | GIELEHNVVI  | VVG---MSEQ | ATSELVTAHG | VMSDALDAAS |
| Pseudomonas_nitroreducens       | -----       | -----       | -----       | -----      | -----      | -----      |
| USDA_110_Bradyrhizobium_japoni  | SDGDVLRYYD  | FSKVASTSA   | GIELMHNVI   | VVG---NSAA | SASEFETGHA | VMNDALDAAA |
| viciae_3841_Rhizobium_legumino  | NDADICTRFD  | FSRCASTSS   | VELTDHEIIV  | VVG---MSAK | WSGPLSDHA  | VMRDALDAHS |
| trifolii_WSM1325_Rhizobium_leg  | GDADICTRFD  | FSRCASTSS   | GELTDHEIIV  | VVG---MSAK | WSGPLSDHA  | VMLDALDAHS |
| Agrobacterium_vitis_S4          | KDTDICTRLD  | YSARASTSA   | VELTDHEIIV  | VVG---MSDH | WSGPFAMTHT | VMFDAMDAPS |
| ORS278_Bradyrhizobium_sp._ORS2  | SDADICADYS  | RYSERAAATSG | VELLDHEIM   | VAG---MSAR | WTGPLADHG  | VMRDALDIEP |
| BTAil_Bradyrhizobium_sp._BTAil  | SDAMICADYA  | RYSERAAATSG | VELLDHEIM   | VAG---MSAD | WTGPLADHA  | VMADALDIEP |
| 4_46_Methylobacterium_sp._4_46  | GETVAETDPG  | RHARRCGASA  | VELLDHEVV   | VVG---MSPD | WTGPLVDHA  | VMADALDLRP |
| AZC_3892_2Azorhizobium_caulino  | SDAVICADYG  | WSARASCSS   | GIELLGHEIV  | VVG---MSEG | WSGPLATAHG | VMADALDVTP |
| Paenibacillus_sp._JDR-2         | QDTDICHSWE  | YSKVASTSA   | GSELAYCEVI  | VVG---NSAY | AEGPYFDHD  | VMKDALDAGA |
| Oceanicola_granulosus_HTCC2516  | NEAAVLRDFS  | VRNVASCSS   | GELVSCNEVI  | VVG---MAPG | WSGPLATAHA | PMADALDVAA |
| Acidithiobacillus_ferroxidans   | SDDVINQDWS  | YSRASVSA    | KPLQRSEMV   | LFA---NSCW | WEGDLVTAHG | VMQDILDVPA |
| JCM_2831_Methylobacterium_radi  | TDPAIGTRRD  | FSGRASASA   | GIELMRNEIIV | VVG---NAPG | WTGPLATAHR | VMDDGIDLPA |
| Micromonas_sp._RCC299           | VYAKTCEDYS  | VFSDHVSSA   | VELMHCELL   | MML(6)SKT  | PRSKFRMARG | RMDDALDLAG |
| AZC_3203_1Azorhizobium_caulino  | TPDMIACDME  | VFSAVASTSA  | GELTKCEVL   | LFG---NAPG | ATSAFRIGHG | VLKDALDVAG |
| Bacillus_cellulosilyticus_DSM_  | DEDSLINEDHS | FSVKTSVSA   | QEQVAARVI   | VVG---NSVK | STSNLYTSG  | VMKDALDLKG |
| Frankia_sp._Eu1lc               | ADDRIRSDWD  | FSAAVATSS   | GGEKRGGEVL  | LLA---NSAQ | SASELRIGHG | ITRDMADTEG |
| Consensus/80%                   | s-.slhpcbs  | LaSshASsSt  | GIEL.psp1l  | VhG....t.. | hst.b.ItHt | VMpDt1D..t |

|                                |            |            |            |            |             |             |
|--------------------------------|------------|------------|------------|------------|-------------|-------------|
| Janibacter_sp._HTCC2649        | IWEATKDAGL | ELP--DRPHT | SDIQGRLVN  | FLKCEVSQD  | QVRCRRNAML  | DDSDVHWH-R  |
| Intrasporangium_calvum_DSM_430 | IWEATKDAGL | DLP--ERPHW | TDIDGRLVN  | FLKCEVSQD  | MVHGRRNAML  | DDSDVHWH-R  |
| Noca_1505_1Nocardioides_sp._JS | IWEATKDAGL | DLP--ERPRT | SDLDGRLVN  | FLKCEASQD  | LVRGRRNAML  | DDSDVHWH-R  |
| PR4_Rhodococcus_erythropolis_P | IWAATRDAGL | ELP--ERPHS | SDLDGQLVN  | FLKCEASQD  | TVRCRRNAML  | DDSDVHWH-R  |
| SK121_Rhodococcus_erythropolis | IWAATRDAGL | ELP--ERPHS | SDLDGQLVN  | FLKCEASQD  | TVRCRRNAML  | DDSDVHWH-R  |
| Barbiturase_Rhodococcus_erythr | IWAATRDAGL | ELP--ERPHS | NDLDGQLVN  | FLKCEASQD  | TVRCRRNAML  | DDSDVHWH-R  |
| jostii_RHA1_Rhodococcus_jostii | IWAATRDAGL | ELP--ERPHT | SDLDGQLVN  | FLKCEASQD  | TVRCRRNAML  | DDSDVHWH-R  |
| B4_Rhodococcus_opacus_B4       | IWSAIRDAGL | ELP--ERPHT | SDLDDRLVN  | FLKCEASQD  | TVRCRRNAML  | DDSDVHWH-R  |
| Saccharomonospora_viridis_DSM_ | IWQATRDAGL | KLP--ENPHP | KDIDGRLVN  | FLKCEASPD  | TVRCRRNAML  | DDSDVHWH-R  |
| Nakamurella_multipartita_DSM_4 | IWAATRDAGL | DLP--DRPHP | RDLDGRLVN  | FLKCEASQD  | QVRCRRNAML  | DDSDVHWH-R  |
| Catenulispora_acidiphila_DSM_4 | IWDATRAACL | ELP--ERPRS | SDLDGRLVN  | FLKCEASTD  | MVRCRRNAML  | DDSDVHWH-R  |
| Streptosporangium_roseum_DSM_4 | IWEATRSGI  | DLP--DRPHP | SDLGGRLVN  | FMKCEADPS  | SVRCRRNIML  | DDSDVHWH-R  |
| Thermobispora_bispora_DSM_4383 | IWEATRNASL | DLP--ERPHP | SDLKGRLVN  | FLKCEADPT  | RVRCRRNIML  | DDSDVHWH-R  |
| Geodermatophilus_obscurus_DSM_ | IWNATRDAGL | DLP--ERPHP | SDLGDRLVN  | FLKCEADPT  | YVRCRRNAML  | DDSDVFWH-R  |
| Noca_4270_2Nocardioides_sp._JS | VWAATRDAGL | DDMPVDCIHP | RHIKGRLVNL | FLKCEADPT  | RVRCRRNIML  | DDSDVAWH-R  |
| Aminobacter_aminovorans        | -----      | -----      | -----      | -----      | -----       | -----       |
| Chelatobacter_heintzii         | -----      | -----      | -----      | -----      | -----       | -----       |
| TRZD_Enterobacter_cloacae      | VRQALRDVGC | CEN---DLPT | VDELGRVVN  | FAKAEASPD  | EVRNRRHTML  | DDSDINST-R  |
| TrzD_Acidovorax_citrulli       | VRQALRDVGC | CEN---DLPT | VDELGRVVN  | FAKAEASPD  | EVRNRRHTML  | DDSDINST-R  |
| Moorella_thermoacetica_ATCC_39 | VRAALKDAGL | KFD---CCPP | AEELAKIVN  | LAKAEAASS  | TVRCRRNTML  | DDSDINHT-R  |
| Clostridium_asparagiforme_DSM_ | VIEATQSACL | EVD---KYPT | DEQAKIIVN  | FAKAEADST  | YVRCRRNTML  | DDSDINHT-R  |
| AD25_Arthrobacter_sp._AD25     | VRRTIESLGL | IRSD---DE  | MDR---IVNV | FAKAEASPD  | VVRCMRHTML  | SDSDINST-R  |
| Comamonas_sp._A2               | -----      | -----      | -----      | -----      | -----       | -----       |
| gi 75369013 sp Q6PMK9 Q6PMK9_9 | VRRTIESLGL | IRSD---DE  | MDR---IVNV | FAKAEASPD  | VVRCMRHTML  | SDSDINST-R  |
| AtzD_ADP_Pseudomonas_sp._ADP   | VRRTIESLGL | IRSD---DE  | MDR---IVNV | FAKAEASPD  | VVRCMRHTML  | SDSDINST-R  |
| Pseudomonas_nitroreducens      | -----      | -----      | -----      | -----      | -----       | -----       |
| USDA_110_Bradyrhizobium_japoni | VTSALKCVG  | LGVA---PQ  | AEAGRELVNI | FAKAEASPD  | SVRCFRHTML  | EDTDISST-R  |
| viciae_3841_Rhizobium_legumino | VRKARERLP  | -----      | -ENS-RLAAV | LAKAEPDPS  | EIDGRRHTML  | DDSDIAGT-R  |
| trifolii_WSM1325_Rhizobium_leg | VRKARERLP  | -----      | -ENS-RLAAV | LAKAEPDPS  | RIDGRRHTML  | DDSDIAGT-R  |
| Agrobacterium_vitis_S4         | VRAAWSMDP  | -----      | -LG--KLSAV | LAKAEPDPR  | TVRCRRHTML  | EDSDISGT-R  |
| ORS278_Bradyrhizobium_sp._ORS2 | ARAALSRLGL | DGP--GQLPA | ASRG-RIAAV | LAKAEAAQS  | KVRCRLHTML  | DDSDVSSST-R |
| BTAil_Bradyrhizobium_sp._BTAil | ARAALARLGI | DSA--GQVPA | AARG-RIAAV | LAKAEAAQS  | RLRCQRHTML  | DDSDIAST-R  |
| 4_46_Methylobacterium_sp._4_46 | VAACLGRLGL | LGPD-GFVDE | AGRA-RLAAL | LAKAEASAD  | AIRGRRHTML  | DDSDIAPT-R  |
| AZC_3892_2Azorhizobium_caulino | VKAALSALG  | -----      | AEAG-EATIV | LAKAEPSRS  | RIRGKRHTML  | DDSDISPT-R  |
| Paenibacillus_sp._JDR-2        | LKRILEKYP  | -----      | --DA-EMVQV | LAKAEADPT  | YIRGQRHTML  | DDSDINHT-R  |
| Oceanicola_granulosus_HTCC2516 | VHHALAGVGL | AAAP--QLAA | GDAA-RLRAV | FVKGEAARS  | LIRGRGHTML  | NDGDDQQ-R   |
| Acidithiobacillus_ferroxidans  | IHAVLNQLCL | QPVN-GQLAD | VDTK-KVLAV | FAKSDADPR  | HIRHRRHTML  | TDADISDM-R  |
| JCM_2831_Methylobacterium_radi | ILGVLSDLGF | PEAG--PLSR | QESE-RVIAL | LVKAEPSHD  | LIRGRRHTML  | DDSDINAT-R  |
| Micromonas_sp._RCC299          | VTRCVDAAR  | -----      | GSRG-TNTIV | TAIVKADPAA | SVRCRRHTML  | SDSDIHAT-R  |
| AZC_3203_1Azorhizobium_caulino | VKEALRSAGL | SFHG---TPS | EEQAHEIVAV | FAKAEAPVN  | RIRGRRHTML  | SDADIHYE-R  |
| Bacillus_cellulosilyticus_DSM_ | MQSAFKDAGI | NHS---DTLS | EEQAQKIVQV | FVNAGADAIN | EVRGRRHTML  | TDALAMHS-I  |
| Frankia_sp._Eu1lc              | IKTARTAGV  | DFD---CCLS | PAQQAQVVQV | FGKFVLPDGS | VLRGQHITAML | DDHEAHV--   |
| Consensus/80%                  | lb.slpsHgl | ..ssV.p... | -.sclssV   | bhKsEss.sG | .lRGpRpsML  | sSDSlp.pGR  |

|                                |            |             |            |             |              |
|--------------------------------|------------|-------------|------------|-------------|--------------|
| Janibacter_sp._HTCC2649        | QIKSCVGGVT | ASVTGDPAVF  | VSVSA--AHQ | GFDCGGPVAA  | IIDLGE(12 )  |
| Intrasporangium_calvum_DSM_430 | QIKAAVGGVT | AAVTGDPAVF  | VSVSA--AHQ | GFDCGGPVAA  | IIDLGE(9) -  |
| Noca_1505_1Nocardioides_sp._JS | QIKSCVGGVT | AAVTGDPAVF  | VSVSA--AHQ | GFDCGGPVAA  | IVDLG-----   |
| PR4_Rhodococcus_erythropolis_P | QIKSCVGGVT | AAVTGDPAVF  | VSVSA--AHQ | GFDCGGPVAA  | IVDLGQ----   |
| SK121_Rhodococcus_erythropolis | QIKSCVGGVT | AAVTGDPAVF  | VSVSA--AHQ | GFDCGGPVAA  | IVDLGQ----   |
| Barbiturase_Rhodococcus_erythr | QIKSCVGGVT | AAVTGDPAVF  | VSVSA--AHQ | GFDCGGPVAA  | IVDLGQ----   |
| jostii_RHA1_Rhodococcus_jostii | QIKSCVGGVA | SSVTGDPAVF  | VSVSA--AHQ | GFDCGGPVAA  | IVDLGQ----   |
| B4_Rhodococcus_opacus_B4       | QIKSCVGGVA | SSVTGDPAVF  | VSVSA--AHQ | GFDCGGPVAA  | IVDLGQ----   |
| Saccharomonospora_viridis_DSM_ | QIKACVGGVT | AAVTGDPAVF  | VSVSA--VHQ | GFAGGGPVAA  | IVDLGD-(8) - |
| Nakamurella_multipartita_DSM_4 | QIKACVGGVT | AAVTGDPAAF  | VSVSA--AHQ | GFDCGGPVAA  | IVDLG-----   |
| Catenulispora_acidiphila_DSM_4 | QIKACVGGVA | ASVTGDPAVF  | VSVSA--AHQ | GFDCGGPVAA  | IVEVGPGA--   |
| Streptosporangium_roseum_DSM_4 | QIKATVGGVA | ASVTGDPAVF  | VSVAA--VHQ | GFSGGGPVAA  | IADLG-----   |
| Thermobispora_bispora_DSM_4383 | QIKAAVGGVA | ASVTGDPAVF  | VSVAA--VHQ | GFAGGGPVIA  | IVDHG-----   |
| Geodermatophilus_obscurus_DSM_ | QIKATVGGVA | ASVTGDPAVF  | VSVAA--VHQ | GFSGGGPVAA  | IYKA-----    |
| Noca_4270_2Nocardioides_sp._JS | QIKACVGGVV | AAVSGDPMNF  | VSVAA--VHQ | GFSGGGPVIA  | IYDLEA----   |
| Aminobacter_aminovorans        | -----      | -----       | -----      | -----       | -----        |
| Chelatobacter_heintzii         | -----      | -----       | -----      | -----       | -----        |
| TRZD_Enterobacter_cloacae      | HARAVVNAVI | ASIVGDPMVY  | VSGGG--EHQ | GFAGGGPVAV  | IARTA-----   |
| TrzD_Acidovorax_citrulli       | HARAVVNAVI | ASIVGDPMVY  | VSGGG--EHQ | GFAGGGPVAV  | IARTA-----   |
| Moorella_thermoacetica_ATCC_39 | SARAVVNAVI | ASVVGDPMVY  | VSGGG--EHQ | GFDCGGPIAV  | IARV-----    |
| Clostridium_asparagiforme_DSM_ | HARAVVNGVI | AAIVNDPMVY  | VSGGG--EHQ | GFDCGGPVAV  | IYKR-----    |
| AD25_Arthrobacter_sp._AD25     | HARAVTGAAI | ASVVGHTVY   | VSGGG--EHQ | GFAGGGPFVAV | IARA-----    |
| Comamonas_sp._A2               | -----      | -----       | -----      | -----       | -----        |
| gi 75369013 sp Q6PMK9 Q6PMK9_9 | HARAVTGAAI | ASVVGHTMVY  | VSGGG--EHQ | GFAGGGPFVAV | IARA-----    |
| AtzD_ADP_Pseudomonas_sp._ADP   | HARAVTGAAI | ASVVGHTMVY  | VSGGG--EHQ | GFAGGGPFVAV | IARA-----    |
| Pseudomonas_nitroreducens      | -----      | -----       | -----      | -----       | -----        |
| USDA_110_Bradyrhizobium_japoni | HARAAVGGLI | AGLAFGTGAVY | VSGGG--EHQ | GFAGGGPVAV  | IARLSD----   |
| viciae_3841_Rhizobium_legumino | HARAFVGGVL | AGIFGITDLY  | VSGGG--EHQ | GFPGGGPVAI  | IYKEQ-----   |
| trifolii_WSM1325_Rhizobium_leg | HARAFVGGVL | AGIFGITDLY  | VSGGG--EHQ | GFPGGGPVAI  | IYKEQ-----   |
| Agrobacterium_vitis_S4         | HARAFVGGVL | AGVFGETDLY  | VSGGG--EHQ | GFPGGGPVAI  | IYREDVI--    |
| ORS278_Bradyrhizobium_sp._ORS2 | HARAFVGGAL | AGLFGFTDLF  | VSGGG--EHQ | GFDCGGPVAI  | IYERR-----   |
| BTAi1_Bradyrhizobium_sp._BTAi1 | HARAFVGGAL | AGLFGFTDLF  | VSGGG--EHQ | GFDCGGPIAI  | IYVERT----   |
| 4_46_Methylobacterium_sp._4_46 | HARAFVAGAL | AGLVGATDLF  | VSGGG--EFQ | GFDCGGPVAV  | IARRSGAASP A |
| AZC_3892_2Azorhizobium_caulino | HARAFVAGAL | AGVVGHTETIY | VSGGG--EHQ | GFDCGGPVAV  | IYAARTMG---  |
| Paenibacillus_sp._JDR-2        | HARAVVGGVL | ASVCGDPMIY  | VSGGG--EHQ | GFAGGGPVAV  | IYFRN-----   |
| Oceanicola_granulosus_HTCC2516 | HIRAALGAVV | AATLGETQLF  | VSGGG--EHQ | GFAGGGLVAV  | IYAERT-----  |
| Acidithiobacillus_ferroxidans  | YSRCVVSALL | AGITGETGVY  | VSTRA--EHQ | GFQGGGPVAV  | IYGYAS-----  |
| JCM_2831_Methylobacterium_radi | HARALVGGVA | AAAIERTDLF  | VSGGG--EHQ | GFDCGGPVAV  | IYARVRD----  |
| Micromonas_sp._RCC299          | HARAAGGVV  | AAAVGDCRVY  | VSGGG--EHQ | GFDCGGPVAV  | IYRVGGAR--   |
| AZC_3203_1Azorhizobium_caulino | HARAAGGAVI | ASVTGDPAIF  | VSGGT--EHQ | CAPGGAAPIA  | IYVRA-----   |
| Bacillus_cellulosilyticus_DSM_ | VAKAVANAVV | GSYVGETRIIL | CSAGS--EHQ | GFQGSNLVAA  | IYRVGGIR--   |
| Frankia_sp._Eu1lc              | -AKAVGGALV | VSITGQPMSE  | IYGGERNSHM | GFPGGNPVAA  | IYVRLPA---   |
| Consensus/80%                  | ph+thVtllh | AtlsGcs.la  | VSstARN.HQ | GPsGGGPVAs  | Isc...s.GP A |

**Fig. S3**

Mass spectra of cyanuric acid hydrolase reaction products using (A) unlabeled and (B) labeled cyanuric acid substrate. Peak distribution from electrospray ionization in negative mode over the approximate reaction time course for  $m/z$  of  $244.0193 \pm 0.058$  Da and  $247.0196 \pm 0.038$  Da for unlabeled and labeled, respectively. These values are the averaged ion mass corresponding to the carboxybiuret anion complexed with potassium and acetate ions.

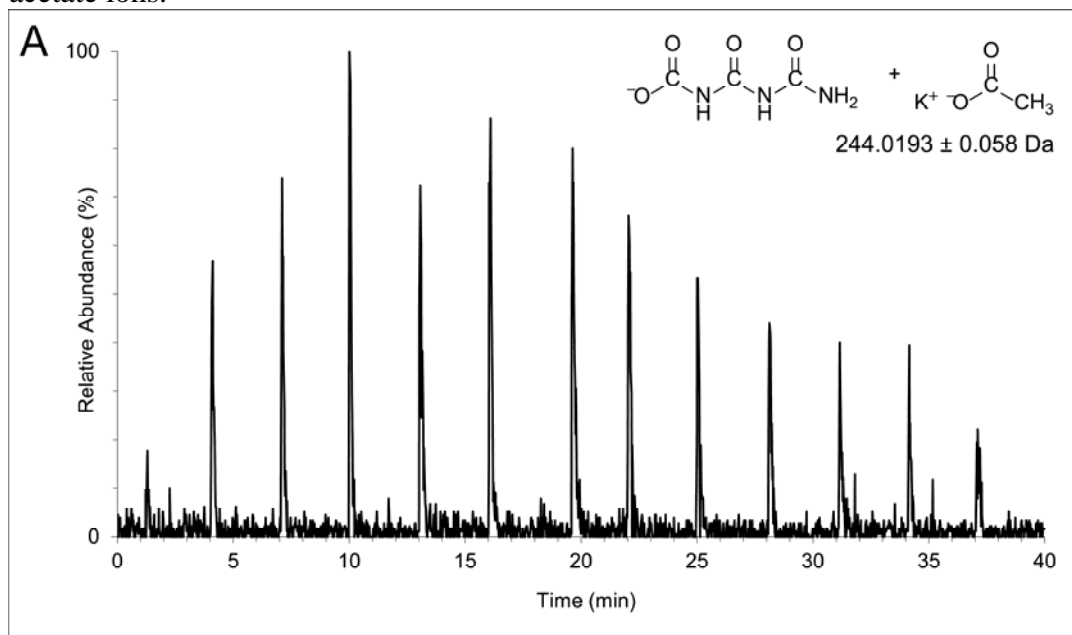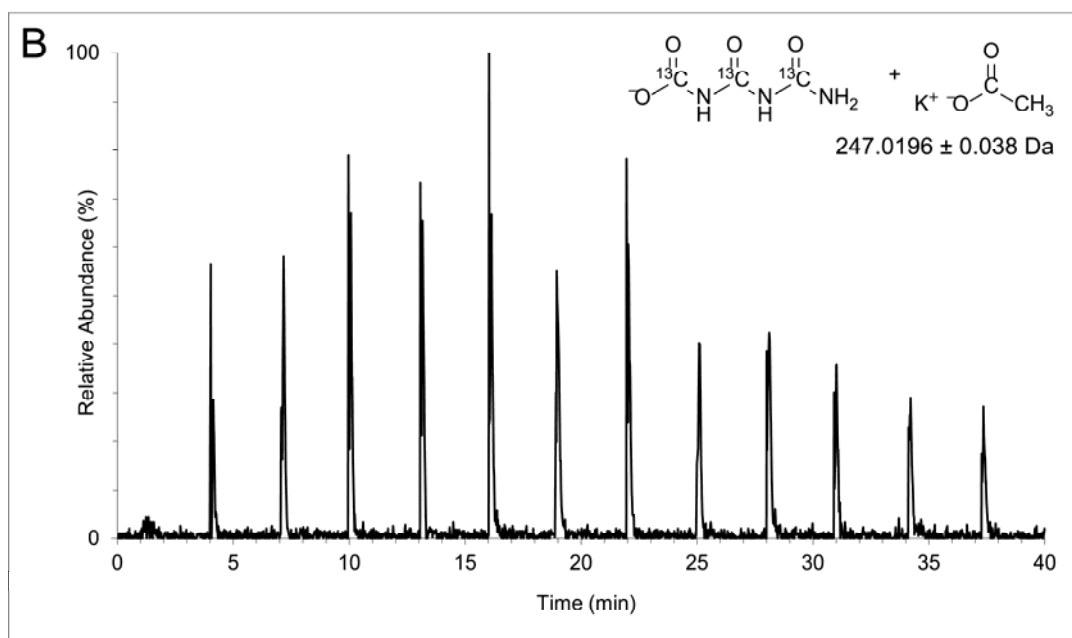

Supplement: JB.00791-12_zjb999091809so1.pdf [file JB.00791-12_zjb999091809so1.pdf]
